# Supplementary material
Source: publisher figshare collection journal article supplement (https://diabetesjournals.figshare.com/ndownloader/files/31764362)

## Supplementary Data

Supplementary Table S1. Item statistics for the four-factor solution to the HFS-II. Factors included, Cronbach's alpha if item deleted and item-total correlation (item dropped) are presented for each HFS-II question item. Note that Ran High factor, question item HFS-2 had less favourable item statistics (item-total correlation 0.46), however, its retention in the Ran High Factor is justified by the high loading onto the factor (0.6) and content validity (statement directly about running glucose high).

| HFS-II factor       | HFS-II item | Cronbach's alpha if item deleted | Item-total correlation (item dropped) |
|---------------------|-------------|----------------------------------|---------------------------------------|
| Ran high            | 2           | 0.85                             | 0.46                                  |
| Ran high            | 13          | 0.58                             | 0.70                                  |
| Ran high            | 14          | 0.62                             | 0.67                                  |
| Sought safety       | 5           | 0.88                             | 0.72                                  |
| Sought safety       | 11          | 0.87                             | 0.79                                  |
| Sought safety       | 15          | 0.88                             | 0.68                                  |
| Sought safety       | 20          | 0.87                             | 0.78                                  |
| Sought safety       | 23          | 0.86                             | 0.82                                  |
| Sought safety       | 30          | 0.90                             | 0.56                                  |
| Restricted activity | 6           | 0.82                             | 0.71                                  |
| Restricted activity | 7           | 0.88                             | 0.51                                  |
| Restricted activity | 8           | 0.80                             | 0.81                                  |
| Restricted activity | 9           | 0.80                             | 0.77                                  |
| Restricted activity | 12          | 0.84                             | 0.64                                  |
| Worry               | 17          | 0.94                             | 0.51                                  |
| Worry               | 18          | 0.93                             | 0.73                                  |
| Worry               | 19          | 0.93                             | 0.79                                  |
| Worry               | 21          | 0.93                             | 0.77                                  |
| Worry               | 22          | 0.93                             | 0.78                                  |

|       |    |      |      |
|-------|----|------|------|
| Worry | 24 | 0.94 | 0.46 |
| Worry | 25 | 0.93 | 0.78 |
| Worry | 26 | 0.93 | 0.76 |
| Worry | 27 | 0.93 | 0.79 |
| Worry | 28 | 0.93 | 0.70 |
| Worry | 29 | 0.93 | 0.72 |
| Worry | 31 | 0.93 | 0.69 |
| Worry | 33 | 0.93 | 0.71 |

*Supplementary Table S2* Statistical analysis for associations between Gold score and HFS-II factors. Groupwise comparisons for each factor by Kruskal-Wallis test; pairwise comparisons by Dunn's post hoc test with adjustment for multiple comparisons. Statistical analysis for associations between recurrent severe hypoglycemia groups and HFS-II factors by Wilcoxon Rank Sum test.

|                               | Worry  | Sought Safety | Restricted Activity | Ran High |
|-------------------------------|--------|---------------|---------------------|----------|
| Gold score                    |        |               |                     |          |
| Kruskal-Wallis                | <0.001 | <0.001        | <0.001              | 0.109    |
| 1 - 2                         | 0.355  | 0.690         | 0.774               | 0.486    |
| 1 - 3                         | 0.323  | 0.579         | 0.293               | 0.742    |
| 2 - 3                         | 0.089  | 0.434         | 0.373               | 0.209    |
| 1 - 4                         | 0.399  | 0.113         | 0.012               | 0.924    |
| 2 - 4                         | 0.093  | 0.033         | 0.014               | 0.496    |
| 3 - 4                         | 0.714  | 0.485         | 0.615               | 0.562    |
| 1 - 5                         | 0.332  | 0.004         | 0.003               | 0.955    |
| 2 - 5                         | 0.041  | <0.001        | 0.004               | 0.439    |
| 3 - 5                         | 0.720  | 0.163         | 0.618               | 0.454    |
| 4 - 5                         | 0.987  | 0.412         | 0.967               | 0.977    |
| 1 - 6                         | 0.004  | <0.001        | 0.004               | 0.554    |
| 2 - 6                         | <0.001 | <0.001        | 0.002               | 0.124    |
| 3 - 6                         | 0.324  | 0.010         | 0.386               | 0.559    |
| 4 - 6                         | 0.096  | 0.019         | 0.750               | 0.607    |
| 5 - 6                         | 0.042  | 0.076         | 0.671               | 0.524    |
| 1 - 7                         | 0.022  | 0.010         | 0.013               | 0.986    |
| 2 - 7                         | 0.001  | 0.002         | 0.015               | 0.574    |
| 3 - 7                         | 0.313  | 0.152         | 0.509               | 0.535    |
| 4 - 7                         | 0.124  | 0.368         | 0.814               | 0.980    |
| 5 - 7                         | 0.091  | 0.708         | 0.794               | 0.950    |
| 6 - 7                         | 0.934  | 0.305         | 0.921               | 0.746    |
| Recurrent severe hypoglycemia |        |               |                     |          |
|                               | <0.001 | <0.001        | <0.001              | 0.440    |

*Supplementary Table S3.* Statistical analysis comparing rate of severe hypoglycemia (column 2) and HbA1c (column 3) between the four clusters as shown in Fig. 2 of the main paper. Pairwise comparisons by Dunn's post hoc test with adjustment for multiple comparisons.

| Cluster comparison | Severe hypoglycemia count (p value) | HbA1c (p value) |
|--------------------|-------------------------------------|-----------------|
| 1 – 2              | 0.300                               | 0.480           |
| 1 – 3              | <0.001                              | 0.006           |
| 2 – 3              | <0.001                              | 0.008           |
| 1 – 4              | <0.001                              | 0.035           |
| 2 – 4              | <0.001                              | 0.025           |
| 3 – 4              | 0.770                               | 0.029           |
| Kruskal-Wallis     | <0.001                              | 0.001           |

*Supplementary Table S4.* Summary of the cluster analysis, with interpretation of the key findings that define each cluster. \* median values for questionnaire scores.

| Cluster number      | 1                                                | 2                                                                   | 3                                                                  | 4                                      |
|---------------------|--------------------------------------------------|---------------------------------------------------------------------|--------------------------------------------------------------------|----------------------------------------|
| Cluster description | Response to lower severe hypoglycemia experience | High hypoglycemia fear and distress; lower severe hypoglycemia risk | High hyperglycemia avoidance; low hypoglycemia fear; high barriers | High hypoglycemia fear; lower barriers |
| A2A Avoid High*     | 1                                                | 1.6                                                                 | 2.3                                                                | 1                                      |
| A2A Minimise*       | 0.62                                             | 0.75                                                                | 1                                                                  | 0.25                                   |
| A2A Normalise*      | 0.25                                             | 0.75                                                                | 0.75                                                               | 0                                      |
| Gold*               | 2                                                | 2                                                                   | 5                                                                  | 5                                      |
| HAS*                | 1.54                                             | 2.17                                                                | 1.96                                                               | 1.83                                   |
| HFS Ran High*       | 1.1                                              | 2                                                                   | 0.38                                                               | 2                                      |
| HFS Restricted*     | 0                                                | 0.46                                                                | 0                                                                  | 0.85                                   |
| HFS Sought Safety*  | 0.18                                             | 1.3                                                                 | 0.37                                                               | 1.6                                    |
| HFS Worry*          | 0.46                                             | 1.7                                                                 | 1.1                                                                | 1.7                                    |
| PAID*               | 12                                               | 40                                                                  | 14                                                                 | 22                                     |
| HbA1c mean (SD)     | 7.7 (0.9)                                        | 8.0 (1.1)                                                           | 6.8 (1.1)                                                          | 7.2 (1.1)                              |
| SH mean (SD)        | 1.9 (7.5)                                        | 1.3 (2.4)                                                           | 14.3 (25.0)                                                        | 11.4 (21.4)                            |

*Supplementary Figure S1.* Study recruitment flowchart, from consented participants up to questionnaire results available for analysis.

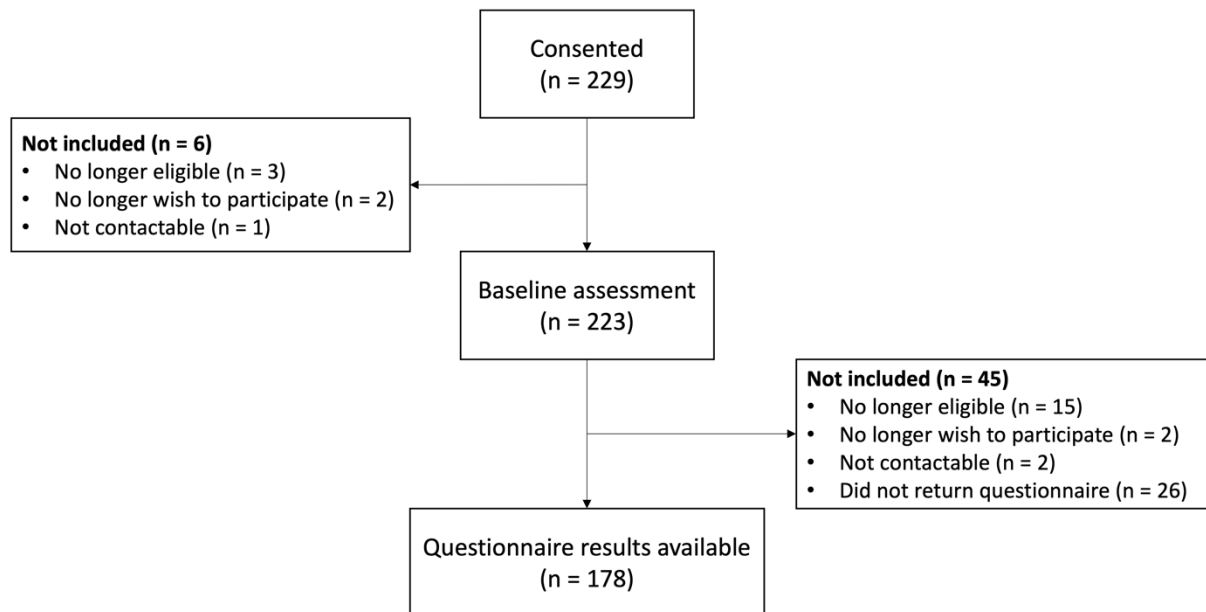

*Supplementary Figure S2.* Forest plot presenting the logistic regression coefficients for the HFS-II factors and diabetes duration (top), against impaired awareness of hypoglycemia (open circles) and recurrent severe hypoglycemia (closed

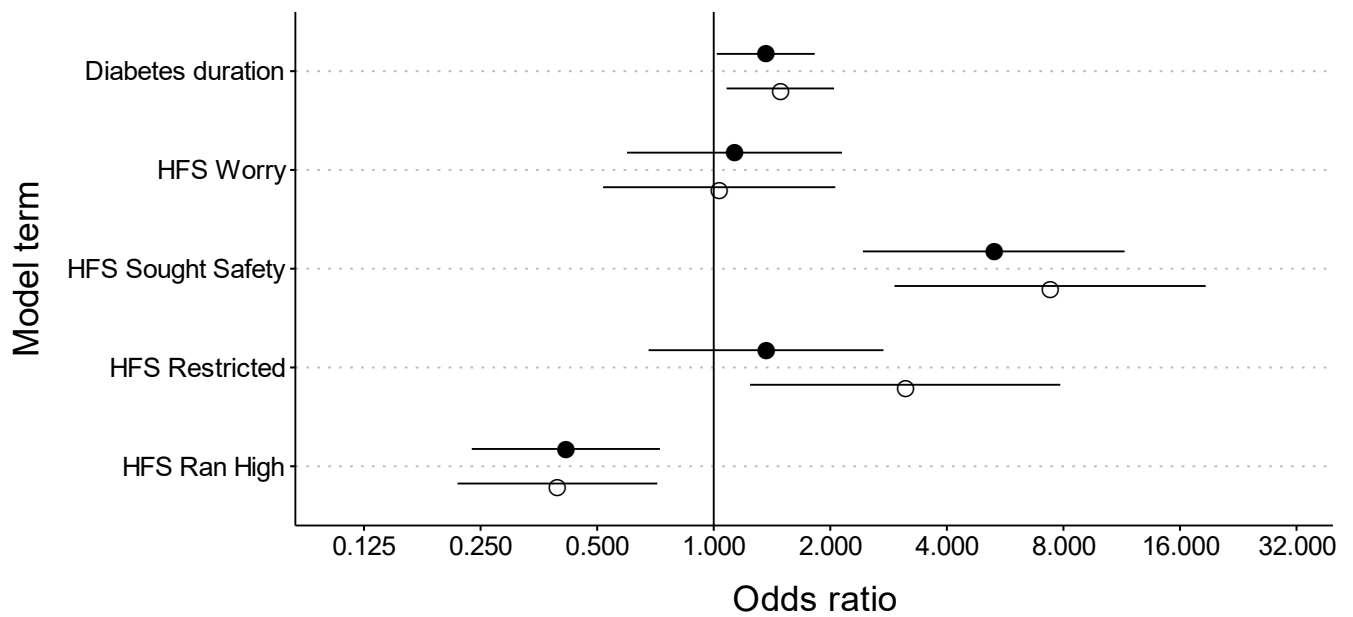

Supplement: Supplementary file 1 [file 31764362]
